# Supplementary material for: Structural functions of the targeted joke: Iranian modernity and the Qazvini man as predatory homosexual
Source: publisher site journal article supplement (doi:10.1515/humor-2016-0008), 2016-01-01
Supplement: Supplementary file 1 [file Supplementary-Cover_Sheet.docx]

**Cover Sheet for REVISED Manuscript (ID: HUMOR.2016.0008)**

**Article’s title:** “Structural functions of the targeted joke: Iranian modernity and the Qazvini man as predatory homosexual”

**Author’s full name:** Mostafa Abedinifard

**Affiliation:** MacEwan University, Edmonton, Alberta, Canada

**Address:** 6-229A, City Centre Campus, Department of English, Grant MacEwan University,

Edmonton, Alberta, Canada T5J 4S2

**Contact information:** [abedinifardm@macewan.ca](mailto:abedinifardm@macewan.ca)

**Word count:** 8,637

**Author Bio**

Mostafa Abedinifard is a faculty member in the Department of English at MacEwan University. He completed his PhD in Comparative Literature in the Department of Modern Languages and Cultural Studies at the University of Alberta, with a dissertation entitled “Humor and Gender Hegemony: The Panoptical Role of Ridicule vis-à-vis Gender” (2015). His current research, which is transnational and interdisciplinary in scope, is in masculinities studies, humor studies, and disability studies. He has published articles on gender and humor in *Cultural Sociology*, *The European Journal of Humor Research*, *Iranian Studies*, and *Social Semiotics*, among other journals.

**Acknowledgements**

The author would like to thank Rasoul Aliakbari, Sahar Allamezade, Mike Lloyd, and Neeraj Prakash for their helpful feedback on earlier versions of this article. He is also grateful to the anonymous reviewers and the journal editor, who made invaluable comments and suggestions, and to Marco Katz Montiel, who edited the author’s English translations of the jokes.
